# Supplementary material
Source: Springer Nature journal article supplement (https://www.springermedizin.de/resource/supplementary/12885_2013_4082_MOESM1_ESM.pdf/9465264)
Supplement: MOESM1 [file 9465264]

## **BASELINE SURVEY FOR CLINICIANS**

Thank you for participating in our study on the quality of conversations between cancer patients and their clinicians. We hope you will take 2 minutes to complete this brief survey.

### **SECTION A – About You**

#### **1. What is your sex?**

- <sub>1</sub> Male  
<sub>2</sub> Female

#### **2. What is your current age?**

\_\_\_\_\_ years

#### **3. Do you consider yourself Hispanic or Latino?**

- <sub>1</sub> Yes  
<sub>2</sub> No

#### **4. How do you classify your race?**

- <sub>1</sub> Asian  
<sub>2</sub> Black or African-American  
<sub>3</sub> American Indian or Alaskan Native  
<sub>4</sub> White or Caucasian  
<sub>5</sub> Other \_\_\_\_\_

- Please proceed to page 2 -

**SECTION B – Your Professional Practice**

**5. What year did you graduate from medical school (if MD) or receive your highest level of professional training (if NP or PA)?**

\_\_\_\_\_

**6. On which of the following organ type(s) does your practice focus?  
(mark up to 3)**

- <sub>1</sub> Brain
- <sub>2</sub> Breast
- <sub>3</sub> Endocrine
- <sub>4</sub> Gastrointestinal
- <sub>5</sub> Genitourinary
- <sub>6</sub> Gynecological
- <sub>7</sub> Head/neck
- <sub>8</sub> Lung
- <sub>9</sub> Melanoma
- <sub>10</sub> Sarcoma
- <sub>11</sub> Other: \_\_\_\_\_

**7. Have you ever had any formal training/coursework in cancer communication (e.g. Oncotalk)?**

- <sub>1</sub> Yes
- <sub>2</sub> No

**8. At the end of this study, we would like to conduct brief in-person interviews to learn more about patient-clinician communication in your clinic. Would you be willing to be re-contacted to consider participating in an interview?**

- <sub>1</sub> Yes, I am willing to be re-contacted.
- <sub>2</sub> No thanks.

**Thank you!**

**Please return your completed survey to study coordinator, Cara Fernandez  
(Internal mailing address: Plummer 3 CTSA)**



**CANCER PATIENT EXPERIENCE AND COMMUNICATION STUDY**  
**PRE-ENCOUNTER PATIENT SURVEY**

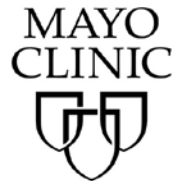

**Thank you for participating in our study on communication between cancer patients and their providers.**

**Please take a few minutes now, before your appointment, to complete this brief survey.**

**When you are finished, please return the survey to the study coordinator, Cara Fernandez, or the main desk where you checked in for your appointment.**

**If you have any questions about this study, please contact:**

**Cara Fernandez, study coordinator: 507-266-1897**

**Katie James, project coordinator: 507-293-0707**



**2. What has been the effect of your cancer diagnosis and treatment on your overall quality of life?** (Please circle the appropriate number)

0 1 2 3 4 5 6 7 8 9 10  
 Totally ruined quality of life No effect on quality of life

Comments: \_\_\_\_\_

**3. What has been the effect of your cancer diagnosis and treatment on your family's quality of life?** (Please circle the appropriate number)

0 1 2 3 4 5 6 7 8 9 10  
 Totally ruined quality of life No effect on quality of life

Comments: \_\_\_\_\_

**SECTION B – Seeking and Understanding Health Information**

**Please answer the following questions about how you seek and understand health information, checking only one box for each item:**

|                                                                                                                                                | None of the time           | A little of the time       | Some of the time           | Most of the time           | All of the time            |
|------------------------------------------------------------------------------------------------------------------------------------------------|----------------------------|----------------------------|----------------------------|----------------------------|----------------------------|
| <b>4. How often do you have someone help you read hospital materials?</b>                                                                      | <input type="checkbox"/> 1 | <input type="checkbox"/> 2 | <input type="checkbox"/> 3 | <input type="checkbox"/> 4 | <input type="checkbox"/> 5 |
| <b>5. How often do you have problems learning about your medical condition because of difficulty understanding <u>written</u> information?</b> | <input type="checkbox"/> 1 | <input type="checkbox"/> 2 | <input type="checkbox"/> 3 | <input type="checkbox"/> 4 | <input type="checkbox"/> 5 |
| <b>6. How often do you have trouble understanding medical information <u>spoken</u> to you by doctors and nurses?</b>                          | <input type="checkbox"/> 1 | <input type="checkbox"/> 2 | <input type="checkbox"/> 3 | <input type="checkbox"/> 4 | <input type="checkbox"/> 5 |

**7. How confident are you filling out medical forms by yourself?**

- 1 Not at all confident
- 2 A little confident
- 3 Somewhat confident
- 4 Very confident
- 5 Extremely confident

**SECTION C – About You****8. Where were you born?**

- <sub>1</sub> United States                      <sub>2</sub> Mexico                      <sub>3</sub> Other country: \_\_\_\_\_

**9. Do you consider yourself Hispanic or Latino?**

- <sub>1</sub> Yes                                      <sub>2</sub> No

**10. How do you classify your race? (Check only one)**

- <sub>1</sub> Asian  
<sub>2</sub> Black or African-American  
<sub>3</sub> American Indian or Alaskan Native  
<sub>4</sub> White or Caucasian  
<sub>5</sub> Other \_\_\_\_\_

**11. In what language(s) do you speak?**

- <sub>1</sub> English only  
<sub>2</sub> Mostly English, some Spanish  
<sub>3</sub> Spanish and English, about equally  
<sub>4</sub> Mostly Spanish, some English  
<sub>5</sub> Spanish only  
<sub>6</sub> Other language: \_\_\_\_\_

**12. What is the highest grade or year of school you completed?**

- <sub>1</sub> Less than high school  
<sub>2</sub> Grade 12 or GED (high school graduate)  
<sub>3</sub> College 1 year to 3 years (some college or technical school)  
<sub>4</sub> College graduate  
<sub>5</sub> Post-graduate study  
<sub>6</sub> Other: \_\_\_\_\_

**13. What is your annual household income from all sources?**

- <sub>1</sub> Less than \$10,000  
<sub>2</sub> \$10,000 to less than \$20,000  
<sub>3</sub> \$20,000 to less than \$35,000  
<sub>4</sub> \$35,000 to less than \$50,000  
<sub>5</sub> \$50,000 to less than \$75,000  
<sub>6</sub> More than \$75,000

**THANK YOU!**

**Please return your completed survey to Cara Fernandez, study coordinator.  
Following your appointment with your cancer provider today, we will ask you to complete  
one more short survey.**





**CANCER PATIENT EXPERIENCE AND COMMUNICATION STUDY**

**POST-ENCOUNTER CLINICIAN SURVEY**

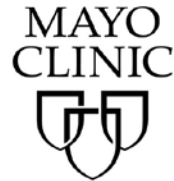

**Thank you for allowing us to audio-record  
your encounter with this patient.**

**Please take a few minutes to complete this brief survey on the  
clinical encounter that just concluded.**

**If you have any questions about this study, please contact:**

**Cara Fernandez, study coordinator: 507-266-1897**

**Katie James, project coordinator: 507-293-0707**

## POST-ENCOUNTER CLINICIAN SURVEY

Please answer the following questions about the clinical encounter you just finished with a patient in our study:

**1. At what point in the cancer control spectrum is this patient?**

- <sub>1</sub> Initial diagnosis
- <sub>2</sub> Early initial treatment
- <sub>3</sub> Mid initial treatment
- <sub>4</sub> Post-treatment/survivorship/remission\*
- <sub>5</sub> Recurrence, undergoing treatment
- <sub>6</sub> End-stage disease

\* Includes patients undergoing ongoing maintenance (e.g. Tamoxifen)

**2. Was a specific decision about this patient’s cancer care made during his/her appointment today?**

- <sub>1</sub> Yes
- <sub>2</sub> No

**3. Please rate how much you agree or disagree with the following statements:**

|                                                                                             | Strongly disagree                     | Somewhat disagree                     | Somewhat agree                        | Strongly agree                        |
|---------------------------------------------------------------------------------------------|---------------------------------------|---------------------------------------|---------------------------------------|---------------------------------------|
| a. I felt that my time with this patient today was well spent.                              | <input type="checkbox"/> <sub>1</sub> | <input type="checkbox"/> <sub>2</sub> | <input type="checkbox"/> <sub>3</sub> | <input type="checkbox"/> <sub>4</sub> |
| b. I established rapport with this patient today.                                           | <input type="checkbox"/> <sub>1</sub> | <input type="checkbox"/> <sub>2</sub> | <input type="checkbox"/> <sub>3</sub> | <input type="checkbox"/> <sub>4</sub> |
| c. I was able to obtain an accurate and detailed medical history from this patient.         | <input type="checkbox"/> <sub>1</sub> | <input type="checkbox"/> <sub>2</sub> | <input type="checkbox"/> <sub>3</sub> | <input type="checkbox"/> <sub>4</sub> |
| d. I think this patient requires a lot of emotional support.                                | <input type="checkbox"/> <sub>1</sub> | <input type="checkbox"/> <sub>2</sub> | <input type="checkbox"/> <sub>3</sub> | <input type="checkbox"/> <sub>4</sub> |
| e. I think that this patient is coping well with his/her cancer treatment and side effects. | <input type="checkbox"/> <sub>1</sub> | <input type="checkbox"/> <sub>2</sub> | <input type="checkbox"/> <sub>3</sub> | <input type="checkbox"/> <sub>4</sub> |
| f. Overall, I was satisfied with this consultation today.                                   | <input type="checkbox"/> <sub>1</sub> | <input type="checkbox"/> <sub>2</sub> | <input type="checkbox"/> <sub>3</sub> | <input type="checkbox"/> <sub>4</sub> |

**Thank you!**  
**Please return your completed survey to study coordinator,**  
**Cara Fernandez (internal mailing address: Plummer 3 CTSA)**



**CANCER PATIENT EXPERIENCE AND COMMUNICATION STUDY**  
**POST-ENCOUNTER PATIENT SURVEY**

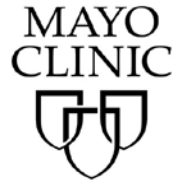

**Thank you for participating in our study on communication  
between cancer patients and their cancer care clinicians.**

**Please take a few minutes today, immediately following your  
appointment, to complete this brief survey.**

**When you are finished, please return the  
survey to the study coordinator, Cara Fernandez,  
or the main desk where you checked in for your appointment.**

**If you have any questions about this study, please contact:**

**Cara Fernandez, study coordinator: 507-266-1897**

**Katie James, project coordinator: 507-293-0707**

## POST-ENCOUNTER PATIENT SURVEY

The term “**clinician**” means a doctor, nurse practitioner, or physician assistant involved in your cancer care. According to our records, you just had an appointment with:

\_\_\_\_\_

Is this information correct? <sub>1</sub> Yes <sub>2</sub> No → Corrected Name: \_\_\_\_\_

**1. Thinking of the visit you just had with your clinician, please select the most appropriate response to each item below:**

|                                                                                                       | Not at all                            | A little                              | Somewhat                              | Quite a bit                           | Very much                             |
|-------------------------------------------------------------------------------------------------------|---------------------------------------|---------------------------------------|---------------------------------------|---------------------------------------|---------------------------------------|
| a. How much did your clinician ask to hear exactly what you expected in this visit?                   | <input type="checkbox"/> <sub>1</sub> | <input type="checkbox"/> <sub>2</sub> | <input type="checkbox"/> <sub>3</sub> | <input type="checkbox"/> <sub>4</sub> | <input type="checkbox"/> <sub>5</sub> |
| b. How much did your clinician try to find out about all your problems and concerns?                  | <input type="checkbox"/> <sub>1</sub> | <input type="checkbox"/> <sub>2</sub> | <input type="checkbox"/> <sub>3</sub> | <input type="checkbox"/> <sub>4</sub> | <input type="checkbox"/> <sub>5</sub> |
| c. Did you and your clinician decide together which problems and concerns you would talk about today? | <input type="checkbox"/> <sub>1</sub> | <input type="checkbox"/> <sub>2</sub> | <input type="checkbox"/> <sub>3</sub> | <input type="checkbox"/> <sub>4</sub> | <input type="checkbox"/> <sub>5</sub> |

**2. Thinking of the visit you just had with your clinician, please select the most appropriate response to each item below:**

|                                                                                          | Yes, definitely                       | Yes, somewhat                         | No                                    |
|------------------------------------------------------------------------------------------|---------------------------------------|---------------------------------------|---------------------------------------|
| a. Did your clinician explain things in a way that was easy to understand?               | <input type="checkbox"/> <sub>1</sub> | <input type="checkbox"/> <sub>2</sub> | <input type="checkbox"/> <sub>3</sub> |
| b. Did your clinician listen carefully to you?                                           | <input type="checkbox"/> <sub>1</sub> | <input type="checkbox"/> <sub>2</sub> | <input type="checkbox"/> <sub>3</sub> |
| c. Did your clinician seem to know the important information about your medical history? | <input type="checkbox"/> <sub>1</sub> | <input type="checkbox"/> <sub>2</sub> | <input type="checkbox"/> <sub>3</sub> |
| d. Did your clinician show respect for what you had to say?                              | <input type="checkbox"/> <sub>1</sub> | <input type="checkbox"/> <sub>2</sub> | <input type="checkbox"/> <sub>3</sub> |
| e. Did your clinician spend enough time with you?                                        | <input type="checkbox"/> <sub>1</sub> | <input type="checkbox"/> <sub>2</sub> | <input type="checkbox"/> <sub>3</sub> |

**3. Did you have questions or concerns about your care or treatment that you wanted to discuss, but did not?**

- <sub>1</sub> Yes →
- <sub>2</sub> No

**4. Was a specific decision about your cancer care made during your appointment today?**

- <sub>1</sub> Yes → Go to question #5.
- <sub>2</sub> No → Go to question #6.

**5. Nine statements related to the decision-making in your consultation are listed below. For each statement, please indicate how much you agree or disagree.**

|                                                                                                | Completely disagree                   | Strongly disagree                     | Somewhat disagree                     | Somewhat agree                        | Strongly agree                        | Completely agree                      |
|------------------------------------------------------------------------------------------------|---------------------------------------|---------------------------------------|---------------------------------------|---------------------------------------|---------------------------------------|---------------------------------------|
| a. My clinician made it clear that a decision needs to be made.                                | <input type="checkbox"/> <sub>1</sub> | <input type="checkbox"/> <sub>2</sub> | <input type="checkbox"/> <sub>3</sub> | <input type="checkbox"/> <sub>4</sub> | <input type="checkbox"/> <sub>5</sub> | <input type="checkbox"/> <sub>6</sub> |
| b. My clinician wanted to know exactly how I wanted to be involved in making the decision.     | <input type="checkbox"/> <sub>1</sub> | <input type="checkbox"/> <sub>2</sub> | <input type="checkbox"/> <sub>3</sub> | <input type="checkbox"/> <sub>4</sub> | <input type="checkbox"/> <sub>5</sub> | <input type="checkbox"/> <sub>6</sub> |
| c. My clinician told me that there are different options for treating my medical conditions.   | <input type="checkbox"/> <sub>1</sub> | <input type="checkbox"/> <sub>2</sub> | <input type="checkbox"/> <sub>3</sub> | <input type="checkbox"/> <sub>4</sub> | <input type="checkbox"/> <sub>5</sub> | <input type="checkbox"/> <sub>6</sub> |
| d. My clinician precisely explained the advantages and disadvantages of the treatment options. | <input type="checkbox"/> <sub>1</sub> | <input type="checkbox"/> <sub>2</sub> | <input type="checkbox"/> <sub>3</sub> | <input type="checkbox"/> <sub>4</sub> | <input type="checkbox"/> <sub>5</sub> | <input type="checkbox"/> <sub>6</sub> |
| e. My clinician helped me understand all the information.                                      | <input type="checkbox"/> <sub>1</sub> | <input type="checkbox"/> <sub>2</sub> | <input type="checkbox"/> <sub>3</sub> | <input type="checkbox"/> <sub>4</sub> | <input type="checkbox"/> <sub>5</sub> | <input type="checkbox"/> <sub>6</sub> |
| f. My clinician asked me which treatment I prefer.                                             | <input type="checkbox"/> <sub>1</sub> | <input type="checkbox"/> <sub>2</sub> | <input type="checkbox"/> <sub>3</sub> | <input type="checkbox"/> <sub>4</sub> | <input type="checkbox"/> <sub>5</sub> | <input type="checkbox"/> <sub>6</sub> |
| g. My clinician and I thoroughly weighed the different treatment options.                      | <input type="checkbox"/> <sub>1</sub> | <input type="checkbox"/> <sub>2</sub> | <input type="checkbox"/> <sub>3</sub> | <input type="checkbox"/> <sub>4</sub> | <input type="checkbox"/> <sub>5</sub> | <input type="checkbox"/> <sub>6</sub> |
| h. My clinician and I selected a treatment option together.                                    | <input type="checkbox"/> <sub>1</sub> | <input type="checkbox"/> <sub>2</sub> | <input type="checkbox"/> <sub>3</sub> | <input type="checkbox"/> <sub>4</sub> | <input type="checkbox"/> <sub>5</sub> | <input type="checkbox"/> <sub>6</sub> |
| i. My clinician and I reached an agreement on how to proceed.                                  | <input type="checkbox"/> <sub>1</sub> | <input type="checkbox"/> <sub>2</sub> | <input type="checkbox"/> <sub>3</sub> | <input type="checkbox"/> <sub>4</sub> | <input type="checkbox"/> <sub>5</sub> | <input type="checkbox"/> <sub>6</sub> |

**6. Below is a list of topics that some patients discuss with their clinicians. For each topic, please answer the corresponding questions, following the arrows (→) and instructions as you do so.**

|                                                                                                                            | Did you discuss this topic?                                                               | Did you <u>want</u> to discuss this topic?                                                                 | Did you discuss this topic as much as you wanted?                                     |
|----------------------------------------------------------------------------------------------------------------------------|-------------------------------------------------------------------------------------------|------------------------------------------------------------------------------------------------------------|---------------------------------------------------------------------------------------|
| <b>6a. Complementary and Alternative Medicine</b><br>(e.g. herbal medicine, acupuncture, homeopathy, meditation)           | <input type="checkbox"/> <sub>1</sub> Yes →<br><input type="checkbox"/> <sub>2</sub> No → | <input type="checkbox"/> <sub>1</sub> Yes →<br><input type="checkbox"/> <sub>2</sub> No → Go to <b>6b.</b> | <input type="checkbox"/> <sub>1</sub> Yes<br><input type="checkbox"/> <sub>2</sub> No |
| <b>6b. Managing symptoms or side effects of treatment</b><br>(e.g. pain, nausea, fatigue)                                  | <input type="checkbox"/> <sub>1</sub> Yes →<br><input type="checkbox"/> <sub>2</sub> No → | <input type="checkbox"/> <sub>1</sub> Yes →<br><input type="checkbox"/> <sub>2</sub> No → Go to <b>6c.</b> | <input type="checkbox"/> <sub>1</sub> Yes<br><input type="checkbox"/> <sub>2</sub> No |
| <b>6c. Emotional or social concerns</b><br>(e.g. anxiety, depression, anger, problems with your relationships with others) | <input type="checkbox"/> <sub>1</sub> Yes →<br><input type="checkbox"/> <sub>2</sub> No → | <input type="checkbox"/> <sub>1</sub> Yes →<br><input type="checkbox"/> <sub>2</sub> No → Go to #7         | <input type="checkbox"/> <sub>1</sub> Yes<br><input type="checkbox"/> <sub>2</sub> No |

**7. Using any number from 0 to 10, where 0 is the worst clinician possible and 10 is the best clinician possible, what number would you use to rate this clinician?**

<sub>0</sub>   <sub>1</sub>   <sub>2</sub>   <sub>3</sub>   <sub>4</sub>   <sub>5</sub>   <sub>6</sub>   <sub>7</sub>   <sub>8</sub>   <sub>9</sub>   <sub>10</sub>  
 (worst possible) (best possible)

**8. Overall, I was satisfied with my visit to this clinician today.**

- <sub>1</sub> Strongly disagree
- <sub>2</sub> Somewhat disagree
- <sub>3</sub> Somewhat agree
- <sub>4</sub> Strongly agree

**9. How comfortable were you being audio-recorded today?**

- <sub>1</sub> Not at all
- <sub>2</sub> A little bit
- <sub>3</sub> Somewhat
- <sub>4</sub> Quite a bit
- <sub>5</sub> Extremely

**10. In 3 months we will mail you a final follow-up survey. In case we need to get in touch with you or remind you about the survey, please provide us with a current phone number where we can reach you.**

( \_\_\_\_\_ ) \_\_\_\_\_ - \_\_\_\_\_

**Thank you very much for your participation!**  
**Please return your completed survey to the study coordinator, Cara Fernandez,**  
**or the main desk where you checked in for your appointment.**





Dear <Dr. Last Name>,

We appreciate your continued participation in our study on communication between cancer patients and their clinicians and allowing us to audio-record your encounters with those patients.

There is one final component of this study that will take about 5 minutes of your time.

Clinicians may differ with respect to their comfort level discussing certain topics with their patients, such as complementary and alternative medicine (CAM), psychosocial concerns and end of life issues. With this survey, we hope to learn more about the attitudes and behaviors of clinicians when it comes to discussing these topics with their patients.

Please complete and return the attached survey to our study team in the enclosed pre-addressed, intra-campus mail envelope. Thank you again very much for your participation!

Sincerely,

A handwritten signature in black ink, appearing to read "Jon Tilburt". The signature is written in a cursive style with a long horizontal stroke extending to the left.

Jon Tilburt, MD and study team

## FOLLOW-UP CLINICIAN SURVEY

### SECTION A

Complementary and Alternative Medicine (CAM) is “a group of diverse medical and health care systems, practices, and products that are not generally considered part of conventional medicine.”

**1. In your practice, in what proportion of all cancer patient consultations does a discussion of CAM occur?**

\_\_\_\_\_ % → **If 0%, please skip to question #5**

**2. How comfortable are you discussing CAM with your patients?**

- 1 Not at all comfortable
- 2 A little comfortable
- 3 Somewhat comfortable
- 4 Very comfortable
- 5 Extremely comfortable

**3. In the past 6 months, please estimate the number of patients you have referred to a CAM practitioner or clinic.**

\_\_\_\_\_

**4. In your experience, at what point in a patient’s disease course is a discussion about CAM most likely to occur during the consultation? (Mark only one)**

- 1 Initial diagnosis
- 2 Early initial treatment
- 3 Mid initial treatment
- 4 Post-treatment/survivorship/remission
- 5 Recurrence, undergoing treatment
- 6 End-stage disease

**5. How beneficial do you think the following services or practices are in promoting patient wellness and/or symptom control in cancer care?**

|                                            | Not at all beneficial      | A little beneficial        | Somewhat beneficial        | Very beneficial            |
|--------------------------------------------|----------------------------|----------------------------|----------------------------|----------------------------|
| <b>HEALTH SERVICES</b>                     |                            |                            |                            |                            |
| a. Acupuncture                             | <input type="checkbox"/> 1 | <input type="checkbox"/> 2 | <input type="checkbox"/> 3 | <input type="checkbox"/> 4 |
| b. Biofeedback                             | <input type="checkbox"/> 1 | <input type="checkbox"/> 2 | <input type="checkbox"/> 3 | <input type="checkbox"/> 4 |
| c. Chiropractic                            | <input type="checkbox"/> 1 | <input type="checkbox"/> 2 | <input type="checkbox"/> 3 | <input type="checkbox"/> 4 |
| d. Energy healing, Reiki, or healing touch | <input type="checkbox"/> 1 | <input type="checkbox"/> 2 | <input type="checkbox"/> 3 | <input type="checkbox"/> 4 |
| e. Hypnotherapy                            | <input type="checkbox"/> 1 | <input type="checkbox"/> 2 | <input type="checkbox"/> 3 | <input type="checkbox"/> 4 |
| f. Massage therapy                         | <input type="checkbox"/> 1 | <input type="checkbox"/> 2 | <input type="checkbox"/> 3 | <input type="checkbox"/> 4 |
| <b>HEALTH PRACTICES</b>                    |                            |                            |                            |                            |
| g. Aromatherapy                            | <input type="checkbox"/> 1 | <input type="checkbox"/> 2 | <input type="checkbox"/> 3 | <input type="checkbox"/> 4 |
| h. Guided Imagery                          | <input type="checkbox"/> 1 | <input type="checkbox"/> 2 | <input type="checkbox"/> 3 | <input type="checkbox"/> 4 |
| i. Herbal Medicine                         | <input type="checkbox"/> 1 | <input type="checkbox"/> 2 | <input type="checkbox"/> 3 | <input type="checkbox"/> 4 |
| j. Homeopathy                              | <input type="checkbox"/> 1 | <input type="checkbox"/> 2 | <input type="checkbox"/> 3 | <input type="checkbox"/> 4 |
| k. Meditation                              | <input type="checkbox"/> 1 | <input type="checkbox"/> 2 | <input type="checkbox"/> 3 | <input type="checkbox"/> 4 |
| l. Prayer                                  | <input type="checkbox"/> 1 | <input type="checkbox"/> 2 | <input type="checkbox"/> 3 | <input type="checkbox"/> 4 |
| m. Special Diets                           | <input type="checkbox"/> 1 | <input type="checkbox"/> 2 | <input type="checkbox"/> 3 | <input type="checkbox"/> 4 |
| n. Supplements or Mega-vitamins            | <input type="checkbox"/> 1 | <input type="checkbox"/> 2 | <input type="checkbox"/> 3 | <input type="checkbox"/> 4 |
| o. Tai Chi or Qi Gong                      | <input type="checkbox"/> 1 | <input type="checkbox"/> 2 | <input type="checkbox"/> 3 | <input type="checkbox"/> 4 |
| p. Yoga                                    | <input type="checkbox"/> 1 | <input type="checkbox"/> 2 | <input type="checkbox"/> 3 | <input type="checkbox"/> 4 |

**SECTION B**

Psychosocial issues discussed with cancer patients may include, but are not limited to, anxiety, depression, anger, and relationship distress.

**6. In your practice, in what proportion of all cancer patient consultations does a discussion of psychosocial issues occur?**

\_\_\_\_\_ % → **If 0%, please skip to question #10**

**7. How comfortable are you discussing psychosocial issues with your patients?**

- 1 Not at all comfortable
- 2 A little comfortable
- 3 Somewhat comfortable
- 4 Very comfortable
- 5 Extremely comfortable

**8. In the past 6 months, please estimate the number of patients you have referred to a psychologist or psychiatrist.**

\_\_\_\_\_

**9. In your experience, at what point in a patient’s disease course is a discussion about psychosocial issues most likely to occur during the consultation? (Mark only one)**

- 1 Initial diagnosis
- 2 Early initial treatment
- 3 Mid initial treatment
- 4 Post-treatment/survivorship/remission
- 5 Recurrence, undergoing treatment
- 6 End-stage disease

**SECTION C**

End-of-life issues discussed with cancer patients may include, but are not limited to, advanced directives, deciding whether to forego additional cancer treatment, and hospice care.

**10. In your practice, in what proportion of all cancer patient consultations does a discussion about end-of-life issues occur?**

\_\_\_\_\_ % → **If 0%, please return your completed survey to the study coordinator.**

**11. How comfortable are you discussing end-of-life issues with your patients?**

- 1 Not at all comfortable
- 2 A little comfortable
- 3 Somewhat comfortable
- 4 Very comfortable
- 5 Extremely comfortable

**12. In the past 6 months, please estimate the number of patients you have referred to each of the following for end-of-life issues:**

\_\_\_\_\_ Chaplain      \_\_\_\_\_ Social Worker      \_\_\_\_\_ Palliative Medicine

**Thank you again for your help with this study!**  
**Please return your completed survey using the enclosed intra-campus mail envelope.**



**CANCER PATIENT EXPERIENCE AND COMMUNICATION STUDY  
3-MONTH FOLLOW-UP PATIENT SURVEY**

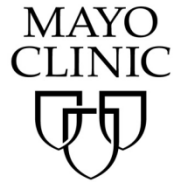

**Dear**

**Thank you for your continued participation in our study on communication between patients with cancer and their clinicians.**

**About 3 months ago, you completed a short survey about quality of life and communication with your main cancer clinician, who could be a doctor, nurse practitioner, or physician assistant involved in your cancer care. This is a follow-up survey to see how you are doing now.**

**We hope that your information combined with information from other cancer patients will allow us to improve the quality of care and quality of life for patients in the future.**

**When you have completed this survey, please place it in the enclosed stamped envelope and mail to the address shown. At this point your participation in our study will be at an end.**

**Thank you again!**

**The Mayo Clinic Study Team**

**Jon C. Tilburt, MD  
Kathleen Yost, PhD  
Ashok Kumbamu, PhD  
Cara Fernandez  
Katherine James, MPH**



## SECTION A – Your Quality of Life

**1. Please circle the number (0-10) best reflecting your feelings during the past week, including today. How would you describe:**

**a. your overall quality of life?**

|           |   |   |   |   |   |   |   |   |   |            |
|-----------|---|---|---|---|---|---|---|---|---|------------|
| 0         | 1 | 2 | 3 | 4 | 5 | 6 | 7 | 8 | 9 | 10         |
| As bad as |   |   |   |   |   |   |   |   |   | As good as |
| it can be |   |   |   |   |   |   |   |   |   | it can be  |

**b. your overall emotional well-being?**

|           |   |   |   |   |   |   |   |   |   |            |
|-----------|---|---|---|---|---|---|---|---|---|------------|
| 0         | 1 | 2 | 3 | 4 | 5 | 6 | 7 | 8 | 9 | 10         |
| As bad as |   |   |   |   |   |   |   |   |   | As good as |
| it can be |   |   |   |   |   |   |   |   |   | it can be  |

**c. your overall physical well-being?**

|           |   |   |   |   |   |   |   |   |   |            |
|-----------|---|---|---|---|---|---|---|---|---|------------|
| 0         | 1 | 2 | 3 | 4 | 5 | 6 | 7 | 8 | 9 | 10         |
| As bad as |   |   |   |   |   |   |   |   |   | As good as |
| it can be |   |   |   |   |   |   |   |   |   | it can be  |

**d. your overall mental (intellectual) well-being?**

|           |   |   |   |   |   |   |   |   |   |            |
|-----------|---|---|---|---|---|---|---|---|---|------------|
| 0         | 1 | 2 | 3 | 4 | 5 | 6 | 7 | 8 | 9 | 10         |
| As bad as |   |   |   |   |   |   |   |   |   | As good as |
| it can be |   |   |   |   |   |   |   |   |   | it can be  |

**e. your level of social activity?**

|           |   |   |   |   |   |   |   |   |   |            |
|-----------|---|---|---|---|---|---|---|---|---|------------|
| 0         | 1 | 2 | 3 | 4 | 5 | 6 | 7 | 8 | 9 | 10         |
| As bad as |   |   |   |   |   |   |   |   |   | As good as |
| it can be |   |   |   |   |   |   |   |   |   | it can be  |

**f. your overall spiritual well-being?**

|           |   |   |   |   |   |   |   |   |   |            |
|-----------|---|---|---|---|---|---|---|---|---|------------|
| 0         | 1 | 2 | 3 | 4 | 5 | 6 | 7 | 8 | 9 | 10         |
| As bad as |   |   |   |   |   |   |   |   |   | As good as |
| it can be |   |   |   |   |   |   |   |   |   | it can be  |

**g. the frequency of your pain?**

|         |   |   |   |   |   |   |   |   |   |               |
|---------|---|---|---|---|---|---|---|---|---|---------------|
| 0       | 1 | 2 | 3 | 4 | 5 | 6 | 7 | 8 | 9 | 10            |
| No pain |   |   |   |   |   |   |   |   |   | Constant pain |

**h. the severity of your pain, on the average?**

|         |   |   |   |   |   |   |   |   |   |                 |
|---------|---|---|---|---|---|---|---|---|---|-----------------|
| 0       | 1 | 2 | 3 | 4 | 5 | 6 | 7 | 8 | 9 | 10              |
| No pain |   |   |   |   |   |   |   |   |   | Pain as bad as  |
|         |   |   |   |   |   |   |   |   |   | you can imagine |

**i. your level of fatigue, on the average?**

|            |   |   |   |   |   |   |   |   |   |           |
|------------|---|---|---|---|---|---|---|---|---|-----------|
| 0          | 1 | 2 | 3 | 4 | 5 | 6 | 7 | 8 | 9 | 10        |
| No fatigue |   |   |   |   |   |   |   |   |   | Constant  |
|            |   |   |   |   |   |   |   |   |   | tiredness |

**j. your level of support from friends and family?**

|            |   |   |   |   |   |   |   |   |   |                  |
|------------|---|---|---|---|---|---|---|---|---|------------------|
| 0          | 1 | 2 | 3 | 4 | 5 | 6 | 7 | 8 | 9 | 10               |
| No support |   |   |   |   |   |   |   |   |   | Highest level of |
|            |   |   |   |   |   |   |   |   |   | Support          |



**SECTION A – Your Quality of Life**

**2. What has been the effect of your cancer diagnosis and treatment on your overall quality of life?** (Please circle the appropriate number)

0      1      2      3      4      5      6      7      8      9      10  
Totally ruined      No effect on  
quality of life      quality of life

Comments: \_\_\_\_\_

**3. What has been the effect of your cancer diagnosis and treatment on your family’s quality of life?** (Please circle the appropriate number)

0      1      2      3      4      5      6      7      8      9      10  
Totally ruined      No effect on  
quality of life      quality of life

Comments: \_\_\_\_\_

**4. Compared to 3 months ago, how would you describe your overall quality of life now?** (Check ONE box below)

- 1 A lot worse quality of life
- 2 A little worse quality of life
- 3 About the same quality of life
- 4 A little better quality of life
- 5 A lot better quality of life

## **SECTION B – Making Decisions about Cancer Care**

For the next 2 questions, the term “**clinician**” means a doctor, nurse practitioner, or physician assistant involved in your cancer care

**5. Which of these five statements best describes the role you would prefer to have in decisions about your cancer care? (Please circle the most appropriate letter)**

| A                                                                                 | B                                                                                                          | C                                                                                                       | D                                                                                                          | E                                                                                   |
|-----------------------------------------------------------------------------------|------------------------------------------------------------------------------------------------------------|---------------------------------------------------------------------------------------------------------|------------------------------------------------------------------------------------------------------------|-------------------------------------------------------------------------------------|
|  |                           |                        |                          |  |
| I prefer to make decisions about my health care.                                  | I prefer to make decisions about my health care after seriously considering my cancer clinician's opinion. | I prefer that my cancer clinician and I share responsibility for making decisions about my health care. | I prefer that my cancer clinician make decisions about my health care, but seriously considers my opinion. | I prefer to leave decisions about my health care to my cancer clinician.            |

**6. Which of these five statements best describes the role you actually have had in decisions about your cancer care? (Please circle the most appropriate box)**

| A                                                                                   | B                                                                                                        | C                                                                                      | D                                                                                        | E                                                                                     |
|-------------------------------------------------------------------------------------|----------------------------------------------------------------------------------------------------------|----------------------------------------------------------------------------------------|------------------------------------------------------------------------------------------|---------------------------------------------------------------------------------------|
|  |                       |     |      |  |
| I made all the decisions about my health care.                                      | I made all the decisions about my health care after seriously considering my cancer clinician's opinion. | My cancer clinician and I shared the responsibility for deciding what was best for me. | My cancer clinician made decisions about my cancer after seriously considers my opinion. | I left all the decisions about my cancer to my cancer clinician.                      |

## SECTION C - Complementary and Alternative Medicine

**The following questions are about some health services that typically require you to see a practitioner. They are listed in alphabetical order. A glossary of terms can be found on page 10-11.**

| Type of Health Service                       | When did you see a provider or practitioner for this service? (Mark <u>one</u> )                                                                                                                                                                  | Did you see a provider or practitioner for this service in the <u>last 3 months</u> ? |
|----------------------------------------------|---------------------------------------------------------------------------------------------------------------------------------------------------------------------------------------------------------------------------------------------------|---------------------------------------------------------------------------------------|
| Acupuncture                                  | <input type="checkbox"/> Never → <b>go to next type of service</b><br><input type="checkbox"/> Only before cancer diagnosis ↑<br><input type="checkbox"/> Only after cancer diagnosis<br><input type="checkbox"/> Before & after cancer diagnosis | <input type="checkbox"/> Yes<br><input type="checkbox"/> No                           |
| Biofeedback                                  | <input type="checkbox"/> Never → <b>go to next type of service</b><br><input type="checkbox"/> Only before cancer diagnosis ↑<br><input type="checkbox"/> Only after cancer diagnosis<br><input type="checkbox"/> Before & after cancer diagnosis | <input type="checkbox"/> Yes<br><input type="checkbox"/> No                           |
| Chiropractic care                            | <input type="checkbox"/> Never → <b>go to next type of service</b><br><input type="checkbox"/> Only before cancer diagnosis ↑<br><input type="checkbox"/> Only after cancer diagnosis<br><input type="checkbox"/> Before & after cancer diagnosis | <input type="checkbox"/> Yes<br><input type="checkbox"/> No                           |
| Energy Healing, Reiki or Healing Touch       | <input type="checkbox"/> Never → <b>go to next type of service</b><br><input type="checkbox"/> Only before cancer diagnosis ↑<br><input type="checkbox"/> Only after cancer diagnosis<br><input type="checkbox"/> Before & after cancer diagnosis | <input type="checkbox"/> Yes<br><input type="checkbox"/> No                           |
| Hypnotherapy                                 | <input type="checkbox"/> Never → <b>go to next type of service</b><br><input type="checkbox"/> Only before cancer diagnosis ↑<br><input type="checkbox"/> Only after cancer diagnosis<br><input type="checkbox"/> Before & after cancer diagnosis | <input type="checkbox"/> Yes<br><input type="checkbox"/> No                           |
| Massage therapy                              | <input type="checkbox"/> Never → <b>go to next type of service</b><br><input type="checkbox"/> Only before cancer diagnosis ↑<br><input type="checkbox"/> Only after cancer diagnosis<br><input type="checkbox"/> Before & after cancer diagnosis | <input type="checkbox"/> Yes<br><input type="checkbox"/> No                           |
| Other practitioner (e.g. traditional healer) | <input type="checkbox"/> Never → <b>go page 6</b><br><input type="checkbox"/> Only before cancer diagnosis ↑<br><input type="checkbox"/> Only after cancer diagnosis<br><input type="checkbox"/> Before & after cancer diagnosis                  | <input type="checkbox"/> Yes<br><input type="checkbox"/> No                           |

| <p><b>Since being diagnosed with cancer, did you use this service for any of these reasons? (Mark <u>all</u> that apply)</b></p>                                                                                            | <p><b>Since being diagnosed with cancer, did you let your main cancer clinician know about your use of this service?</b></p> | <p><b>What role did your main cancer clinician have in your use of this type of service? (Mark <u>one</u>)</b></p>                                                                                                                                                       |
|-----------------------------------------------------------------------------------------------------------------------------------------------------------------------------------------------------------------------------|------------------------------------------------------------------------------------------------------------------------------|--------------------------------------------------------------------------------------------------------------------------------------------------------------------------------------------------------------------------------------------------------------------------|
| <p><input type="checkbox"/> To fight the cancer<br/> <input type="checkbox"/> To manage side effects of cancer treatment<br/> <input type="checkbox"/> To improve well-being<br/> <input type="checkbox"/> Other: _____</p> | <p><input type="checkbox"/> Yes<br/> <input type="checkbox"/> No</p>                                                         | <p><input type="checkbox"/> No role<br/> <input type="checkbox"/> He/she had no opinion about my use of this service<br/> <input type="checkbox"/> He/she suggested I use this service<br/> <input type="checkbox"/> He/she cautioned against my use of this service</p> |
| <p><input type="checkbox"/> To fight the cancer<br/> <input type="checkbox"/> To manage side effects of cancer treatment<br/> <input type="checkbox"/> To improve well-being<br/> <input type="checkbox"/> Other: _____</p> | <p><input type="checkbox"/> Yes<br/> <input type="checkbox"/> No</p>                                                         | <p><input type="checkbox"/> No role<br/> <input type="checkbox"/> He/she had no opinion about my use of this service<br/> <input type="checkbox"/> He/she suggested I use this service<br/> <input type="checkbox"/> He/she cautioned against my use of this service</p> |
| <p><input type="checkbox"/> To fight the cancer<br/> <input type="checkbox"/> To manage side effects of cancer treatment<br/> <input type="checkbox"/> To improve well-being<br/> <input type="checkbox"/> Other: _____</p> | <p><input type="checkbox"/> Yes<br/> <input type="checkbox"/> No</p>                                                         | <p><input type="checkbox"/> No role<br/> <input type="checkbox"/> He/she had no opinion about my use of this service<br/> <input type="checkbox"/> He/she suggested I use this service<br/> <input type="checkbox"/> He/she cautioned against my use of this service</p> |
| <p><input type="checkbox"/> To fight the cancer<br/> <input type="checkbox"/> To manage side effects of cancer treatment<br/> <input type="checkbox"/> To improve well-being<br/> <input type="checkbox"/> Other: _____</p> | <p><input type="checkbox"/> Yes<br/> <input type="checkbox"/> No</p>                                                         | <p><input type="checkbox"/> No role<br/> <input type="checkbox"/> He/she had no opinion about my use of this service<br/> <input type="checkbox"/> He/she suggested I use this service<br/> <input type="checkbox"/> He/she cautioned against my use of this service</p> |
| <p><input type="checkbox"/> To fight the cancer<br/> <input type="checkbox"/> To manage side effects of cancer treatment<br/> <input type="checkbox"/> To improve well-being<br/> <input type="checkbox"/> Other: _____</p> | <p><input type="checkbox"/> Yes<br/> <input type="checkbox"/> No</p>                                                         | <p><input type="checkbox"/> No role<br/> <input type="checkbox"/> He/she had no opinion about my use of this service<br/> <input type="checkbox"/> He/she suggested I use this service<br/> <input type="checkbox"/> He/she cautioned against my use of this service</p> |
| <p><input type="checkbox"/> To fight the cancer<br/> <input type="checkbox"/> To manage side effects of cancer treatment<br/> <input type="checkbox"/> To improve well-being<br/> <input type="checkbox"/> Other: _____</p> | <p><input type="checkbox"/> Yes<br/> <input type="checkbox"/> No</p>                                                         | <p><input type="checkbox"/> No role<br/> <input type="checkbox"/> He/she had no opinion about my use of this service<br/> <input type="checkbox"/> He/she suggested I use this service<br/> <input type="checkbox"/> He/she cautioned against my use of this service</p> |
| <p><input type="checkbox"/> To fight the cancer<br/> <input type="checkbox"/> To manage side effects of cancer treatment<br/> <input type="checkbox"/> To improve well-being<br/> <input type="checkbox"/> Other: _____</p> | <p><input type="checkbox"/> Yes<br/> <input type="checkbox"/> No</p>                                                         | <p><input type="checkbox"/> No role<br/> <input type="checkbox"/> He/she had no opinion about my use of this service<br/> <input type="checkbox"/> He/she suggested I use this service<br/> <input type="checkbox"/> He/she cautioned against my use of this service</p> |

## SECTION C - Complementary and Alternative Medicine

The following questions are about some health practices that typically require you to see a practitioner. They are listed in alphabetical order. A glossary of terms can be found on page 10-11.

| Type of Health Practice | When did you use/do this practice? (Mark <u>one</u> )                                                                                                                                                                                                                                                                                                                                                                                                                                                            | Did you use/do this practice in the <u>last 3 months</u> ?  |
|-------------------------|------------------------------------------------------------------------------------------------------------------------------------------------------------------------------------------------------------------------------------------------------------------------------------------------------------------------------------------------------------------------------------------------------------------------------------------------------------------------------------------------------------------|-------------------------------------------------------------|
| Aromatherapy            | <input type="checkbox"/> Never → <b>go to next type of practice</b><br><input type="checkbox"/> Only before cancer diagnosis <br><input type="checkbox"/> Only after cancer diagnosis <br><input type="checkbox"/> Before & after cancer diagnosis        | <input type="checkbox"/> Yes<br><input type="checkbox"/> No |
| Guided Imagery          | <input type="checkbox"/> Never → <b>go to next type of practice</b><br><input type="checkbox"/> Only before cancer diagnosis <br><input type="checkbox"/> Only after cancer diagnosis <br><input type="checkbox"/> Before & after cancer diagnosis        | <input type="checkbox"/> Yes<br><input type="checkbox"/> No |
| Herbal Medicine         | <input type="checkbox"/> Never → <b>go to next type of practice</b><br><input type="checkbox"/> Only before cancer diagnosis <br><input type="checkbox"/> Only after cancer diagnosis <br><input type="checkbox"/> Before & after cancer diagnosis   | <input type="checkbox"/> Yes<br><input type="checkbox"/> No |
| Homeopathy              | <input type="checkbox"/> Never → <b>go to next type of practice</b><br><input type="checkbox"/> Only before cancer diagnosis <br><input type="checkbox"/> Only after cancer diagnosis <br><input type="checkbox"/> Before & after cancer diagnosis  | <input type="checkbox"/> Yes<br><input type="checkbox"/> No |
| Meditation              | <input type="checkbox"/> Never → <b>go to next type of practice</b><br><input type="checkbox"/> Only before cancer diagnosis <br><input type="checkbox"/> Only after cancer diagnosis <br><input type="checkbox"/> Before & after cancer diagnosis  | <input type="checkbox"/> Yes<br><input type="checkbox"/> No |
| Prayer                  | <input type="checkbox"/> Never → <b>go to page 8</b><br><input type="checkbox"/> Only before cancer diagnosis <br><input type="checkbox"/> Only after cancer diagnosis <br><input type="checkbox"/> Before & after cancer diagnosis                 | <input type="checkbox"/> Yes<br><input type="checkbox"/> No |

| <p><b>Since being diagnosed with cancer, did you use this practice for any of these reasons? (Mark <u>all</u> that apply)</b></p>                                                                                           | <p><b>Since being diagnosed with cancer, did you let your main cancer clinician know about your use of this practice?</b></p> | <p><b>What role did your main cancer clinician have in your use of this type of practice? (Mark <u>one</u>)</b></p>                                                                                                                                                         |
|-----------------------------------------------------------------------------------------------------------------------------------------------------------------------------------------------------------------------------|-------------------------------------------------------------------------------------------------------------------------------|-----------------------------------------------------------------------------------------------------------------------------------------------------------------------------------------------------------------------------------------------------------------------------|
| <p><input type="checkbox"/> To fight the cancer<br/> <input type="checkbox"/> To manage side effects of cancer treatment<br/> <input type="checkbox"/> To improve well-being<br/> <input type="checkbox"/> Other: _____</p> | <p><input type="checkbox"/> Yes<br/> <input type="checkbox"/> No</p>                                                          | <p><input type="checkbox"/> No role<br/> <input type="checkbox"/> He/she had no opinion about my use of this practice<br/> <input type="checkbox"/> He/she suggested I use this practice<br/> <input type="checkbox"/> He/she cautioned against my use of this service</p>  |
| <p><input type="checkbox"/> To fight the cancer<br/> <input type="checkbox"/> To manage side effects of cancer treatment<br/> <input type="checkbox"/> To improve well-being<br/> <input type="checkbox"/> Other: _____</p> | <p><input type="checkbox"/> Yes<br/> <input type="checkbox"/> No</p>                                                          | <p><input type="checkbox"/> No role<br/> <input type="checkbox"/> He/she had no opinion about my use of this practice<br/> <input type="checkbox"/> He/she suggested I use this practice<br/> <input type="checkbox"/> He/she cautioned against my use of this practice</p> |
| <p><input type="checkbox"/> To fight the cancer<br/> <input type="checkbox"/> To manage side effects of cancer treatment<br/> <input type="checkbox"/> To improve well-being<br/> <input type="checkbox"/> Other: _____</p> | <p><input type="checkbox"/> Yes<br/> <input type="checkbox"/> No</p>                                                          | <p><input type="checkbox"/> No role<br/> <input type="checkbox"/> He/she had no opinion about my use of this practice<br/> <input type="checkbox"/> He/she suggested I use this practice<br/> <input type="checkbox"/> He/she cautioned against my use of this service</p>  |
| <p><input type="checkbox"/> To fight the cancer<br/> <input type="checkbox"/> To manage side effects of cancer treatment<br/> <input type="checkbox"/> To improve well-being<br/> <input type="checkbox"/> Other: _____</p> | <p><input type="checkbox"/> Yes<br/> <input type="checkbox"/> No</p>                                                          | <p><input type="checkbox"/> No role<br/> <input type="checkbox"/> He/she had no opinion about my use of this practice<br/> <input type="checkbox"/> He/she suggested I use this practice<br/> <input type="checkbox"/> He/she cautioned against my use of this service</p>  |
| <p><input type="checkbox"/> To fight the cancer<br/> <input type="checkbox"/> To manage side effects of cancer treatment<br/> <input type="checkbox"/> To improve well-being<br/> <input type="checkbox"/> Other: _____</p> | <p><input type="checkbox"/> Yes<br/> <input type="checkbox"/> No</p>                                                          | <p><input type="checkbox"/> No role<br/> <input type="checkbox"/> He/she had no opinion about my use of this practice<br/> <input type="checkbox"/> He/she suggested I use this practice<br/> <input type="checkbox"/> He/she cautioned against my use of this service</p>  |
| <p><input type="checkbox"/> To fight the cancer<br/> <input type="checkbox"/> To manage side effects of cancer treatment<br/> <input type="checkbox"/> To improve well-being<br/> <input type="checkbox"/> Other: _____</p> | <p><input type="checkbox"/> Yes<br/> <input type="checkbox"/> No</p>                                                          | <p><input type="checkbox"/> No role<br/> <input type="checkbox"/> He/she had no opinion about my use of this practice<br/> <input type="checkbox"/> He/she suggested I use this practice<br/> <input type="checkbox"/> He/she cautioned against my use of this service</p>  |

## SECTION C - Complementary and Alternative Medicine

**The following questions are about some health practices that typically require you to see a practitioner. They are listed in alphabetical order. A glossary of terms be found on page 10-11.**

| Type of Health Practice           | When did you use/do this practice? (Mark <u>one</u> )                                                                          | Did you use/do this practice in the <u>last 3 months</u> ?      |
|-----------------------------------|--------------------------------------------------------------------------------------------------------------------------------|-----------------------------------------------------------------|
| Special Diets                     | <input type="checkbox"/> Never → <b>go to next type of practice</b><br><input type="checkbox"/> Only before cancer diagnosis ↑ | <input type="checkbox"/> Yes<br><br><input type="checkbox"/> No |
|                                   | <input type="checkbox"/> Only after cancer diagnosis<br><input type="checkbox"/> Before & after cancer diagnosis               |                                                                 |
| Supplements or Mega-vitamins      | <input type="checkbox"/> Never → <b>go to next type of practice</b><br><input type="checkbox"/> Only before cancer diagnosis   | <input type="checkbox"/> Yes<br><br><input type="checkbox"/> No |
|                                   | <input type="checkbox"/> Only after cancer diagnosis<br><input type="checkbox"/> Before & after cancer diagnosis               |                                                                 |
| Tai Chi or Qi Gong                | <input type="checkbox"/> Never → <b>go to next type of practice</b><br><input type="checkbox"/> Only before cancer diagnosis   | <input type="checkbox"/> Yes<br><br><input type="checkbox"/> No |
|                                   | <input type="checkbox"/> Only after cancer diagnosis<br><input type="checkbox"/> Before & after cancer diagnosis               |                                                                 |
| Yoga                              | <input type="checkbox"/> Never → <b>go to next type of practice</b><br><input type="checkbox"/> Only before cancer diagnosis   | <input type="checkbox"/> Yes<br><br><input type="checkbox"/> No |
|                                   | <input type="checkbox"/> Only after cancer diagnosis<br><input type="checkbox"/> Before & after cancer diagnosis               |                                                                 |
| Other practice (e.g. home remedy) | <input type="checkbox"/> Never<br><input type="checkbox"/> Only before cancer diagnosis                                        | <input type="checkbox"/> Yes<br><br><input type="checkbox"/> No |
|                                   | <input type="checkbox"/> Only after cancer diagnosis<br><input type="checkbox"/> Before & after cancer diagnosis               |                                                                 |

## SECTION C - Complementary and Alternative Medicine

| <b>Since being diagnosed with cancer, did you use this practice for any of these reasons? (Mark <u>all</u> that apply)</b>                                                                                     | <b>Since being diagnosed with cancer, did you let your main cancer clinician know about your use of this practice?</b> | <b>What role did your main cancer clinician have in your use of this type of practice? (Mark <u>one</u>)</b>                                                                                                                                                   |
|----------------------------------------------------------------------------------------------------------------------------------------------------------------------------------------------------------------|------------------------------------------------------------------------------------------------------------------------|----------------------------------------------------------------------------------------------------------------------------------------------------------------------------------------------------------------------------------------------------------------|
| <input type="checkbox"/> To fight the cancer<br><input type="checkbox"/> To manage side effects of cancer treatment<br><input type="checkbox"/> To improve well-being<br><input type="checkbox"/> Other: _____ | <input type="checkbox"/> Yes<br><br><input type="checkbox"/> No                                                        | <input type="checkbox"/> No role<br><input type="checkbox"/> He/she had no opinion about my use of this practice<br><input type="checkbox"/> He/she suggested I use this practice<br><input type="checkbox"/> He/she cautioned against my use of this practice |
| <input type="checkbox"/> To fight the cancer<br><input type="checkbox"/> To manage side effects of cancer treatment<br><input type="checkbox"/> To improve well-being<br><input type="checkbox"/> Other: _____ | <input type="checkbox"/> Yes<br><br><input type="checkbox"/> No                                                        | <input type="checkbox"/> No role<br><input type="checkbox"/> He/she had no opinion about my use of this practice<br><input type="checkbox"/> He/she suggested I use this practice<br><input type="checkbox"/> He/she cautioned against my use of this practice |
| <input type="checkbox"/> To fight the cancer<br><input type="checkbox"/> To manage side effects of cancer treatment<br><input type="checkbox"/> To improve well-being<br><input type="checkbox"/> Other: _____ | <input type="checkbox"/> Yes<br><br><input type="checkbox"/> No                                                        | <input type="checkbox"/> No role<br><input type="checkbox"/> He/she had no opinion about my use of this practice<br><input type="checkbox"/> He/she suggested I use this practice<br><input type="checkbox"/> He/she cautioned against my use of this practice |
| <input type="checkbox"/> To fight the cancer<br><input type="checkbox"/> To manage side effects of cancer treatment<br><input type="checkbox"/> To improve well-being<br><input type="checkbox"/> Other: _____ | <input type="checkbox"/> Yes<br><br><input type="checkbox"/> No                                                        | <input type="checkbox"/> No role<br><input type="checkbox"/> He/she had no opinion about my use of this practice<br><input type="checkbox"/> He/she suggested I use this practice<br><input type="checkbox"/> He/she cautioned against my use of this practice |
| <input type="checkbox"/> To fight the cancer<br><input type="checkbox"/> To manage side effects of cancer treatment<br><input type="checkbox"/> To improve well-being<br><input type="checkbox"/> Other: _____ | <input type="checkbox"/> Yes<br><br><input type="checkbox"/> No                                                        | <input type="checkbox"/> No role<br><input type="checkbox"/> He/she had no opinion about my use of this practice<br><input type="checkbox"/> He/she suggested I use this practice<br><input type="checkbox"/> He/she cautioned against my use of this practice |

**Thank you! You have completed the survey.**



## **Glossary of Complementary and Alternative Medicine Terminology**

**Acupuncture** – one of the oldest healing practices in the world, acupuncture is a family of procedures in which specific points on the body (i.e. “acupoints”) are stimulated using a variety of techniques (e.g. penetrating the skin with needles, electrical stimulation) most commonly to treat pain.

**Aromatherapy** – a therapy in which the scent of oils from flowers, herbs, and trees is inhaled to promote health and well-being.

**Biofeedback** – learned techniques used by a patient to consciously regulate bodily functions such as breathing, heart rate, and blood pressure. Biofeedback is commonly used to reduce stress, eliminate headaches, relieve pain, and recondition injured muscles.

**Chiropractic care** – a therapy which involves adjusting the spinal column, joints and improving alignment or positioning of the vertebrae. It is primarily used to treat back problems, headaches, nerve inflammation, muscle spasms, and other injuries/traumas.

**Energy Healing** – a type of healing aimed at restoring and balancing the natural life force energy within the body by the channeling of healing energy through the hands of a practitioner into the patient’s body.

**Guided Imagery** – involves a series of relaxation techniques followed by the visualization of detailed images. A practitioner describes a scene or mental image for the patient to focus on, such as an image of the patient’s body free of the specific problem or condition. Guided imagery has been used to help with alleviate stress, anxiety, high blood pressure, headaches, and to control pain or side effects of cancer therapy or surgery.

**Healing Touch** – this practice, derived from the ancient technique of “laying-on of hands,” is based on the premise that the healing force of the therapist can impact the patient’s recovery and that healing is promoted when there is a balance of the body’s energies.

**Herbal Medicine** – also referred to as botanical medicine, is the use of a plant’s seeds, berries, roots, leaves, bark, or flowers for purposes of improving health, preventing disease, and treating illness. Examples of widely used herbal medicines include echinacea, St. John’s wort, ginkgo, ginseng, and garlic.

**Homeopathy** – a system of medical practices based on the theory that substances that make you ill can also cure you (e.g. giving a homeopathic dose of onions to alleviate symptoms of a common cold, or coffee to a person suffering from insomnia). Homeopathic remedies are derived from many natural sources such as plants, metals, and minerals and are given in very small doses.

## **Glossary of Complementary and Alternative Medicine Terminology**

**Hypnotherapy** – also known as hypnosis, involves the power of suggestion by a trained hypnotist during a deep state of relaxation. This therapy, similar to meditation and mental imagery, is used to effect positive changes and treat numerous health conditions including ulcers, chronic pain, respiratory ailments, stress, and headaches.

**Massage Therapy** – a type of therapy in which a practitioner manipulates muscle and connective tissue to enhance function of those tissues and aid in relaxation, lower blood pressure, and improve circulation.

**Meditation** – a group of techniques, many of which started in Eastern religious or spiritual traditions, that involve contemplation, reflection, or directing one's attention towards particular thoughts or concepts. Meditation is often used to induce mental tranquility and physical relaxation.

**Prayer** – an active process of appealing to a higher spiritual power which is done either individually or in a group on behalf of oneself or others.

**Qi Gong** – an ancient Chinese discipline that uses gentle, repetitive physical movements, mental focus, and deep breathing directed toward specific parts of the body.

**Reiki** – a type of energy medicine in which a practitioner places his or her hands on or near the patient with the intent to transmit *ki*, believed to be life-force energy. Reiki originated in Japan.

**Special Diets** – diet-based therapies aimed at enhancing health, examples include Atkins, Pritikin, Ornish, and Zone.

**Supplements or Mega-vitamins** – supplements are substances or products added to a person's diet to ensure they receive the nutrients they need. This can include vitamins, minerals, protein, or fat. Mega-vitamin therapy refers to taking vitamins in doses that exceed their recommended daily allowance (RDA).

**Tai Chi** – a Chinese mind-body practice that involves moving one's body slowly and gently, while breathing deeply and meditating. It is thought to improve the flow throughout the body of a vital energy called "qi."

**Yoga** – an ancient system of practices used to balance the mind and body through exercise, meditation, and control of breathing and emotions. When most people hear the term yoga, they usually think of *Hatha* or *Kundalini* yoga, which involves the adoption of various bodily postures or poses. It is commonly used for relaxation or to improve flexibility and balance.



**Thank you again for your participation in this study! Please do not hesitate to contact our research team if you have any questions.**

**(507) 266-1897**

**[fernandez.cara@mayo.edu](mailto:fernandez.cara@mayo.edu)**
